# Supplementary material
Source: publisher figshare collection journal article supplement (https://brill.figshare.com/articles/dataset/_/12721193)
Supplement: Supplementary file 1 [file 1]

**A molecular phylogeny of the long-horned bees in the genus  
*Melissodes* Latreille (Hymenoptera: Apidae: Eucerinae)**

**Karen W. Wright<sup>a,b,\*</sup>, Kelly B. Miller<sup>a</sup> and Hojun Song<sup>b</sup>**

<sup>a</sup>Department of Biology, University of New Mexico, Albuquerque, NM, USA

<sup>b</sup>Department of Entomology, Texas A&M University, College Station, TX, USA.

\*Corresponding author, e-mail: [kwright@tamu.edu](mailto:kwright@tamu.edu)

**Supplementary material**

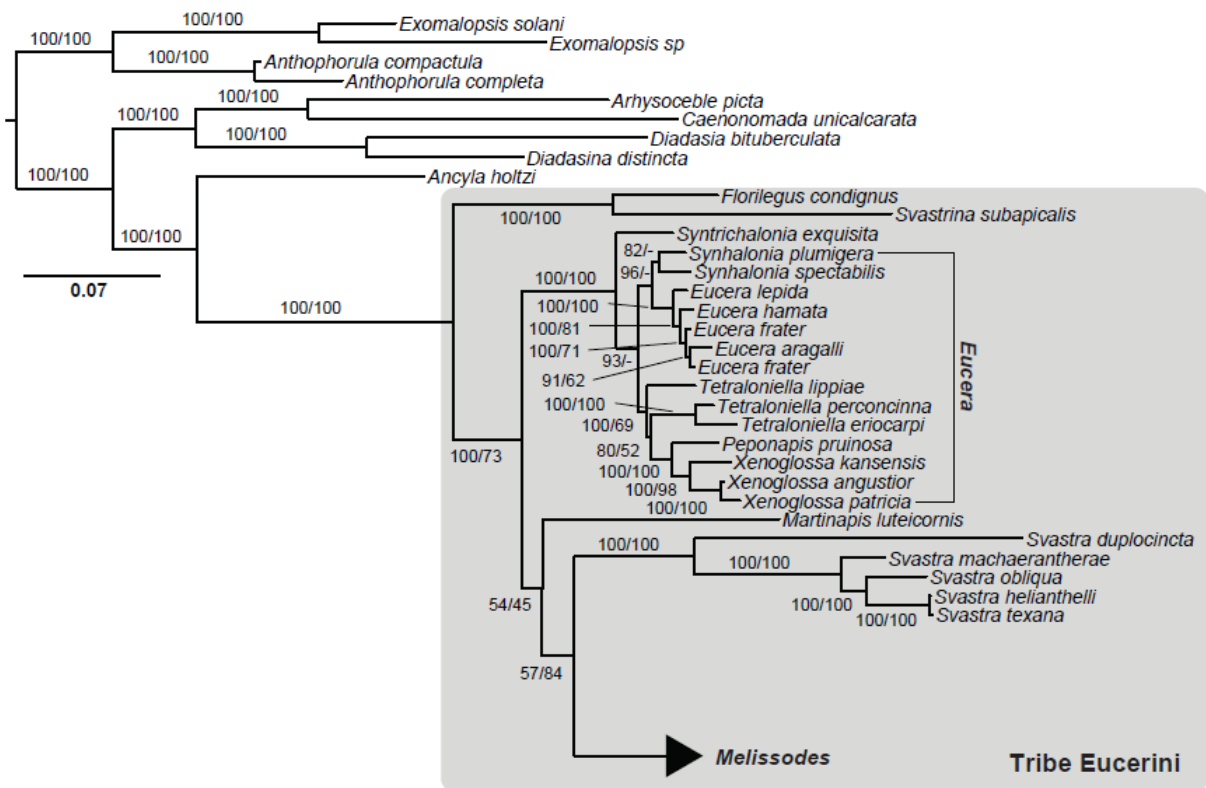

**Fig. 1.** Bayesian outgroups tree.

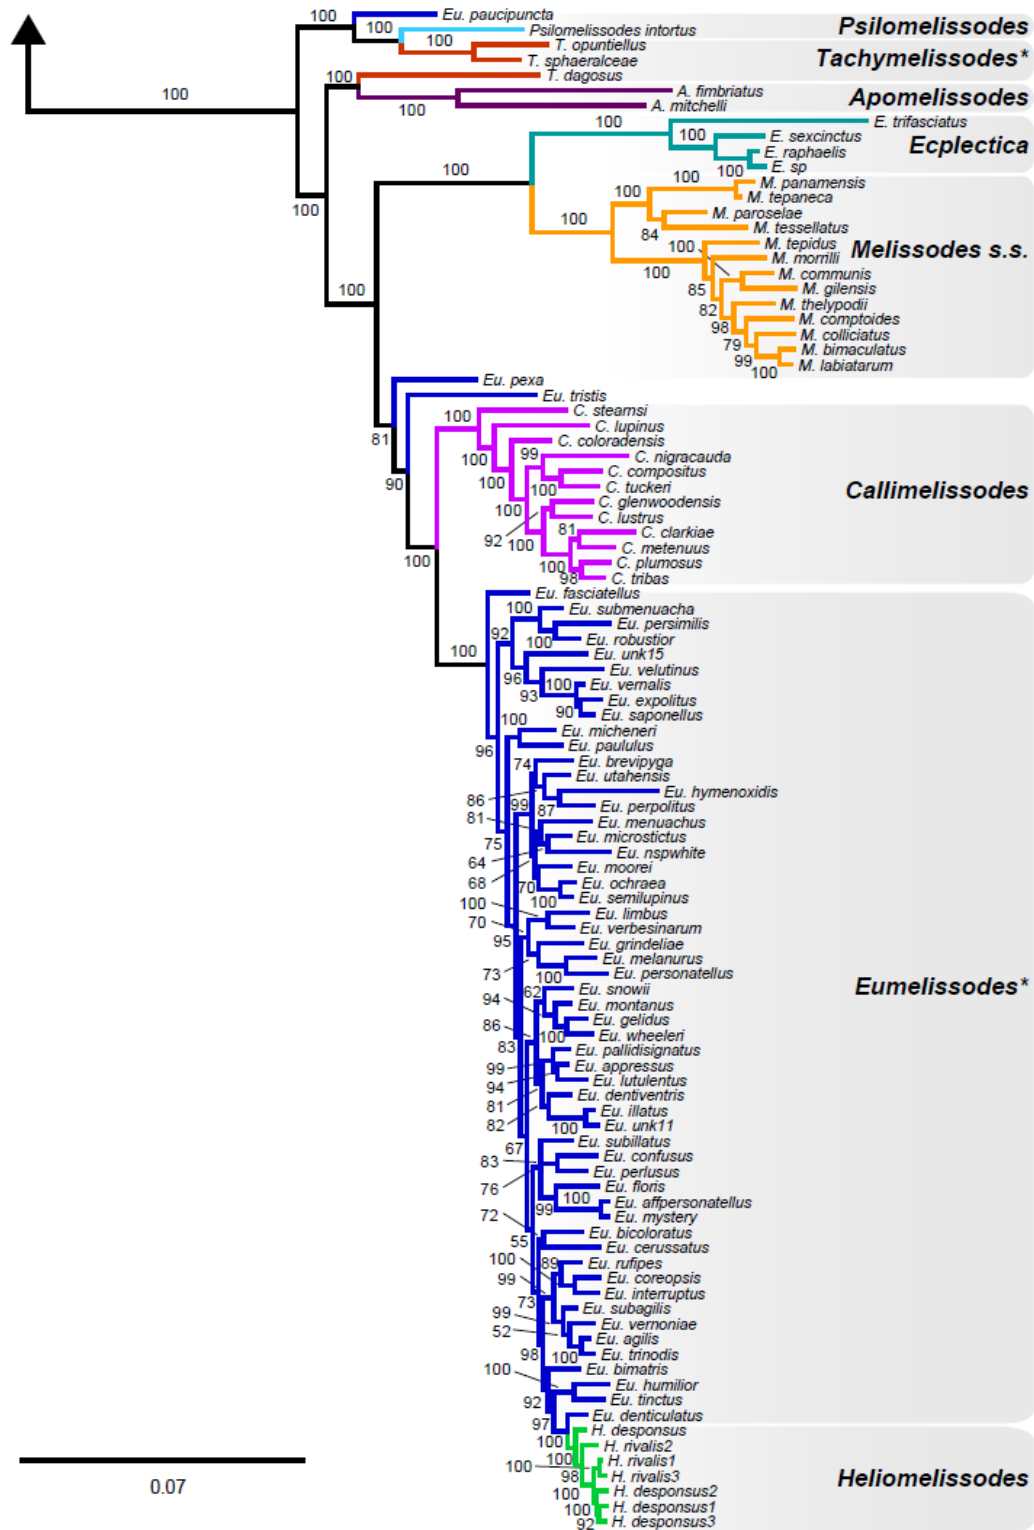

**Fig. 2.** Bayesian ingroup tree.
