# Supplementary material
Source: publisher figshare collection journal article supplement (https://brill.figshare.com/articles/dataset/_/12721193)
Supplement: Supplementary file 1 [file 1]

## Sheet: Sheet1
Table S1
Taxa					GenBank accession numbers
Tribe	Genus	Subgenus	species	SampleNumber	EF1a	ArgK	Opsin	PolII	COI_tRNA_COII	18S	NaK	Wingless	comments on sequences	Institution/Owner of specimen	Collector
Ancylini	Ancyla	NA	holtzi	NA	GU244913	----------	GU245235	GU245352	----------	GU244591	GU245057	GU245510		From Cardinal and Danforth, 2013	?
Emphorini	Diadasia	Coquillettapis	bituberculata	NA	GU244927	----------	AF344594	GU245367	----------	GU244606	GU245074	GU245527		From Cardinal and Danforth, 2013	?
Emphorini	Diadasina	NA	distincta	NA	GU244929	----------	GU245248	GU245369	----------	GU244608	GU245076	GU245529		From Cardinal and Danforth, 2013	?
Eucerini	Eucera	Peponapis	pruinosa	49	MG257000	MG257166	MG257311	MG257463	MG384533	----------	----------	----------		UNMC	K. Wright
Eucerini	Eucera	Synhalonia	aragalli	255	MG257017	MG257099	MG257242	MG257390	MG384461	----------	----------	----------		UNMC	D. Drons
Eucerini	Eucera	Synhalonia	frater1	256	MG257018	MG257100	----------	MG257391	MG384462	----------	----------	----------		UNMC	D. Drons
Eucerini	Eucera	Synhalonia	frater2	NA	----------	----------	GU245232	GU245385	----------	GU244626	GU245094	GU245547		From Cardinal and Danforth, 2013	?
Eucerini	Eucera	Synhalonia	hamata1	171	MG257006	MG257045	MG257189	MG257334	MG384409	----------	----------	----------		UNMC	D. Drons
Eucerini	Eucera	Synhalonia	hamata2	311	----------	MG257133	MG257277	MG257427	MG384497	----------	----------	----------	ArgK, reverse only	UNMC	D. Drons
Eucerini	Eucera	Synhalonia	lepida	172	MG257007	MG257046	MG257190	MG257335	MG384410	----------	----------	----------		UNMC	D. Drons
Eucerini	Eucera	Synhalonia	plumigera	365	----------	MG257152	----------	MG257449	MG384519	----------	----------	----------		UNMC	A. Dorchin
Eucerini	Eucera	Synhalonia	spectabilis	364	----------	MG257151	----------	MG257448	MG384518	----------	----------	----------		UNMC	A. Dorchin
Eucerini	Eucera	Syntrichalonia	exquisita	251	----------	MG257096	----------	MG257386	MG384457	----------	----------	----------		UNMC	J.G. Rozen
Eucerini	Eucera	Xenoglossa	angustior	NA	----------	----------	GU245233	GU245386	----------	GU244627	GU245095	GU245548		From Cardinal and Danforth, 2013	?
Eucerini	Eucera	Xenoglossa	kansensis	253	MG256981	MG257097	----------	MG257388	MG384459	----------	----------	----------	EF1a, forward only	UNMC	J.S. Ascher
Eucerini	Eucera	Xenoglossa	patricia	260	----------	MG257104	----------	MG257395	MG384466	----------	----------	----------		UNMC	K. Wright
Eucerini	Eucera	Xenoglossodes	eriocarpi	252	MG257013	----------	MG257240	MG257387	MG384458	----------	----------	----------	EF1a, forward only	UNMC	K. Wright
Eucerini	Eucera	Xenoglossodes	lippiae	254	MG257016	MG257098	MG257241	MG257389	MG384460	----------	----------	----------		UNMC	K.B. Miller
Eucerini	Eucera	Xenoglossodes	perconcinna	278	MG257021	MG257115	MG257258	MG257408	MG384478	----------	----------	----------		UNMC	E.S. Wyman
Eucerini	Florilegus	Florilegus	condignus	290	MG256983	MG257122	MG257266	MG257416	MG384486	----------	----------	----------		UNMC	D. Hackett
Eucerini	Martinapis	Martinapis	luteicornis1	170	MG256976	MG257044	MG257188	MG257333	MG384408	----------	----------	----------		UNMC	K. Wright
Eucerini	Martinapis	Martinapis	luteicornis2	310	MG256986	MG257132	MG257276	MG257426	MG384496	----------	----------	----------		UNMC	K. Wright
Eucerini	Melissodes	Apomelissodes	fimbriatus	372	----------	MG257156	MG257301	MG257453	MG384523	----------	----------	----------		UNMC	D.J. Biddinger
Eucerini	Melissodes	Apomelissodes	mitchelli	301	----------	MG257127	MG257271	MG257421	MG384491	----------	----------	----------	PolII, reverse only	UNMC	S.W. Droege
Eucerini	Melissodes	Callimelissodes	clarkiae	370	MG250073	MG257154	MG257299	MG257451	MG384521	----------	----------	----------		BLCU	J.M Meiners
Eucerini	Melissodes	Callimelissodes	coloradensis	175	MG250020	MG257049	MG257193	MG257338	MG384413	----------	----------	----------		UNMC	K. Wright
Eucerini	Melissodes	Callimelissodes	compositus	152	MG257004	MG257038	MG257181	MG257326	MG384402	----------	----------	----------		UNMC	K. Wright
Eucerini	Melissodes	Callimelissodes	glenwoodensis	160	MG250016	MG257040	MG257184	MG257329	MG384405	----------	----------	----------		UNMC	K. Wright
Eucerini	Melissodes	Callimelissodes	lupinus	121	MG257001	MG257028	MG257171	MG257316	MG384392	----------	----------	----------		UNMC	K. Wright
Eucerini	Melissodes	Callimelissodes	lustrus	136	MG250011	MG257032	MG257175	MG257320	MG384396	----------	----------	----------	ArgK, reverse only	UNMC	K. Wright
Eucerini	Melissodes	Callimelissodes	metenuus	236	MG250049	MG257089	MG257233	MG257379	MG384451	----------	----------	----------		BLCU	M.E. Erwin
Eucerini	Melissodes	Callimelissodes	nigracauda	281	MG257022	MG257118	MG257261	MG257411	MG384481	----------	----------	----------		BLCU	M.E. Erwin
Eucerini	Melissodes	Callimelissodes	plumosus1	191	MG250026	MG257058	MG257201	MG257347	MG384422	----------	----------	----------		UNMC	K. Hung
Eucerini	Melissodes	Callimelissodes	plumosus2	194	MG250029	MG257061	MG257204	MG257350	MG384425	----------	----------	----------		UNMC	K. Hung
Eucerini	Melissodes	Callimelissodes	plumosus3	358	MG256998	MG257149	MG257296	MG257446	MG384516	----------	----------	----------		BLCU	J.M Meiners
Eucerini	Melissodes	Callimelissodes	plumosus4	211	MG250039	MG257073	MG257216	MG257362	MG384437	----------	----------	----------		BLCU	T. Lamperty
Eucerini	Melissodes	Callimelissodes	stearnsi	192	MG250027	MG257059	MG257202	MG257348	MG384423	----------	----------	----------		UNMC	K. Hung
Eucerini	Melissodes	Callimelissodes	tribas1	193	MG250028	MG257060	MG257203	MG257349	MG384424	----------	----------	----------		UNMC	K. Hung
Eucerini	Melissodes	Callimelissodes	tribas2	289	MG257024	MG257121	MG257265	MG257415	MG384485	----------	----------	----------		UNMC	K. Hung
Eucerini	Melissodes	Callimelissodes	tuckeri	371	MG250074	MG257155	MG257300	MG257452	MG384522	----------	----------	----------		OSEC	A. Begosh
Eucerini	Melissodes	Ecplectica	raphaelis	300	MG256984	MG257126	MG257270	MG257420	MG384490	----------	----------	----------		UCRC	D. Aquino
Eucerini	Melissodes	Ecplectica	sexcinctus	306	MG256985	MG257131	MG257275	MG257425	MG384495	----------	----------	----------	EF1a, forward only	UFVB	F.A. Silveira
Eucerini	Melissodes	Ecplectica	sp.	233	MG256980	MG257087	MG257231	MG257377	MG384449	----------	----------	----------		BLCU	M.E. Erwin
Eucerini	Melissodes	Ecplectica	trifasciatus	350	----------	MG257147	MG257292	MG257442	MG384512	----------	----------	----------		UNMC	P. Gambino
Eucerini	Melissodes	Eumelissodes	aff.personatellus	323	MG257027	MG257139	MG257284	MG257434	MG384505	----------	----------	----------	EF1a, forward only	UNMC	K. Wright
Eucerini	Melissodes	Eumelissodes	agilis	131	MG250010	MG257031	MG257174	MG257319	MG384395	----------	----------	----------	ArgK, reverse only	UNMC	K. Wright
Eucerini	Melissodes	Eumelissodes	appressus	338	MG256993	MG257144	MG257289	MG257439	MG384509	----------	----------	----------		UNMC	K. Hung
Eucerini	Melissodes	Eumelissodes	bicoloratus	212	MG250040	MG257074	MG257217	MG257363	MG384438	----------	----------	----------		BLCU	M.C. Orr
Eucerini	Melissodes	Eumelissodes	bimatris	382	MG250075	MG257159	MG257303	MG257455	MG384526	----------	----------	----------		UNMC	K. Wright
Eucerini	Melissodes	Eumelissodes	brevipyga	269	MG250059	----------	MG257251	MG257401	MG384472	----------	----------	----------		UNMC	S. Walden
Eucerini	Melissodes	Eumelissodes	cerussatus	213	MG257010	MG257075	MG257218	MG257364	MG384439	----------	----------	----------		BLCU	M.C. Orr
Eucerini	Melissodes	Eumelissodes	confusus	143	MG257002	MG257035	MG257178	MG257323	MG384399	----------	----------	----------		UNMC	K. Wright
Eucerini	Melissodes	Eumelissodes	coreopsis1	244	MG257014	MG257092	MG257236	MG257382	MG384454	----------	----------	----------		UNMC	K. Wright
Eucerini	Melissodes	Eumelissodes	coreopsis2	189	MG250024	MG257056	MG257199	MG257345	MG384420	----------	----------	----------	ArgK, reverse only, Opsin, reverse only	UNMC	E. Evans
Eucerini	Melissodes	Eumelissodes	denticulatus1	214	MG257011	MG257076	MG257219	MG257365	----------	----------	----------	----------	ArgK, reverse only, Opsin, forward only	BLCU	S.W. Droege
Eucerini	Melissodes	Eumelissodes	denticulatus2	286	MG257023	MG257120	MG257264	MG257414	MG384484	----------	----------	----------	ArgK, reverse only, EF1a, forward only	UNMC	R.D. Hackett
Eucerini	Melissodes	Eumelissodes	dentiventrus	215	MG257012	MG257077	MG257220	MG257366	MG384440	----------	----------	----------	EF1a, reverse only	BLCU	S.W. Droege
Eucerini	Melissodes	Eumelissodes	expolitus	216	MG250041	MG257078	MG257221	MG257367	MG384441	----------	----------	----------	ArgK, reverse only	BLCU	M.C. Orr
Eucerini	Melissodes	Eumelissodes	fasciatellus	174	MG250019	MG257048	MG257192	MG257337	MG384412	----------	----------	----------		UNMC	K. Wright
Eucerini	Melissodes	Eumelissodes	floris	322	MG256990	MG257138	MG257283	----------	MG384504	----------	----------	----------	EF1a,reverse only	CEET	P. Sagot
Eucerini	Melissodes	Eumelissodes	gelidus1	332	MG256991	MG257142	MG257287	MG257437	MG384507	----------	----------	----------	PolII, reverse only	BLCU	S. Galdek
Eucerini	Melissodes	Eumelissodes	gelidus2	333	MG256992	MG257143	MG257288	MG257438	MG384508	----------	----------	----------		BLCU	S. Galdek
Eucerini	Melissodes	Eumelissodes	grindeliae	144	MG250014	MG257036	MG257179	MG257324	MG384400	----------	----------	----------		UNMC	K. Wright
Eucerini	Melissodes	Eumelissodes	humilior1	199	MG250032	MG257065	MG257208	MG257354	MG384429	----------	----------	----------		UNMC	K. Wright
Eucerini	Melissodes	Eumelissodes	humilior2	40	MG250077	MG257163	MG257307	MG257459	MG384529	----------	----------	----------		UNMC	K. Wright
Eucerini	Melissodes	Eumelissodes	humilior3	43	MG250078	----------	MG257308	MG257460	MG384530	----------	----------	----------	Opsin, forward only	UNMC	K. Wright
Eucerini	Melissodes	Eumelissodes	humilior4	45	MG250079	MG257164	MG257309	MG257461	MG384531	----------	----------	----------		UNMC	K. Wright
Eucerini	Melissodes	Eumelissodes	humilior5	185	MG250022	MG257052	MG257195	MG257341	MG384416	----------	----------	----------		UNMC	K. Wright
Eucerini	Melissodes	Eumelissodes	hymenoxidis	271	MG250060	MG257109	MG257252	MG257402	MG384473	----------	----------	----------	EF1a, reverse only	BLCU	T.L. Griswold
Eucerini	Melissodes	Eumelissodes	illatus1	187	MG256977	MG257054	MG257197	MG257343	MG384418	----------	----------	----------		UNMC	E. Evans
Eucerini	Melissodes	Eumelissodes	illatus2	223	MG250045	MG257082	MG257226	MG257372	MG384445	----------	----------	----------		BLCU	S.W. Droege
Eucerini	Melissodes	Eumelissodes	illatus3	272	MG250061	MG257110	MG257253	MG257403	MG384474	----------	----------	----------		UNMC	E. Evans
Eucerini	Melissodes	Eumelissodes	interruptus	316	MG256988	MG257136	MG257280	MG257431	MG384501	----------	----------	----------	EF1a,reverse only	UNMC	J.S. Ascher
Eucerini	Melissodes	Eumelissodes	limbus	369	----------	MG257153	MG257298	MG257450	MG384520	----------	----------	----------		UNMC	K. Wright
Eucerini	Melissodes	Eumelissodes	lutulentus	142	MG250013	MG257034	MG257177	MG257322	MG384398	----------	----------	----------	ArgK, reverse only	UNMC	K. Wright
Eucerini	Melissodes	Eumelissodes	melanurus	304	MG250070	MG257130	MG257274	MG257424	MG384494	----------	----------	----------		UNMC	K.J. Hung
Eucerini	Melissodes	Eumelissodes	menuachus	21	MG250037	MG257071	MG257214	MG257360	MG384435	----------	----------	----------		UNMC	K. Wright
Eucerini	Melissodes	Eumelissodes	micheneri	273	MG250062	MG257111	MG257254	MG257404	MG384475	----------	----------	----------		UNMC	N/A
Eucerini	Melissodes	Eumelissodes	microstictus	230	MG250047	MG257086	MG257230	MG257376	MG384448	----------	----------	----------		BLCU	M.C. Orr
Eucerini	Melissodes	Eumelissodes	montanus	149	MG257003	MG257037	MG257180	MG257325	MG384401	----------	----------	----------		UNMC	K. Wright
Eucerini	Melissodes	Eumelissodes	moorei	303	MG257026	MG257129	MG257273	MG257423	MG384493	----------	----------	----------		UNMC	K.J. Hung
Eucerini	Melissodes	Eumelissodes	mystery	374	----------	MG257157	MG257302	MG257454	MG384524	----------	----------	----------		UNMC	E.S. Wyman
Eucerini	Melissodes	Eumelissodes	n.sp.white	280	MG256982	MG257117	MG257260	MG257410	MG384480	----------	----------	----------		UNMC	J. Edwards
Eucerini	Melissodes	Eumelissodes	ochraea	210	MG250038	MG257072	MG257215	MG257361	MG384436	----------	----------	----------		UNMC	K. Wright
Eucerini	Melissodes	Eumelissodes	pallidisignatus	206	MG250034	MG257068	MG257211	MG257357	MG384432	----------	----------	----------	ArgK, reverse only	UNMC	K. Wright
Eucerini	Melissodes	Eumelissodes	paucipuncta	241	MG250050	MG257090	MG257234	MG257380	MG384452	----------	----------	----------		UNMC	K. Wright
Eucerini	Melissodes	Eumelissodes	paululus	385	MG250076	MG257162	MG257306	MG257458	MG384528	----------	----------	----------		UNMC	K.J. Hung
Eucerini	Melissodes	Eumelissodes	perlusus	217	MG250042	MG257079	MG257222	MG257368	MG384442	----------	----------	----------		BLCU	N. Klass
Eucerini	Melissodes	Eumelissodes	perpolitus1	218	MG321405	MG257080	MG257223	MG257369	MG384443	----------	----------	----------	ArgK, reverse only	BLCU	K. Krauss
Eucerini	Melissodes	Eumelissodes	perpolitus2	313	MG321404	MG257135	MG257278	MG257429	MG384499	----------	----------	----------		BLCU	H. Ikerd
Eucerini	Melissodes	Eumelissodes	persimilis	353	MG256995	----------	MG257293	MG257443	MG384513	----------	----------	----------	PolII, reverse only	CEET	L. Tlapaya
Eucerini	Melissodes	Eumelissodes	personatellus1	203	MG250033	MG257067	MG257210	MG257356	MG384431	----------	----------	----------		UNMC	K.J. Hung
Eucerini	Melissodes	Eumelissodes	personatellus2	302	----------	MG257128	MG257272	MG257422	MG384492	----------	----------	----------		UNMC	K.J. Hung
Eucerini	Melissodes	Eumelissodes	pexa	56	MG250082	MG257168	MG257313	MG257465	MG384535	----------	----------	----------		UNMC	K. Wright
Eucerini	Melissodes	Eumelissodes	robustior1	127	MG250008	MG257029	MG257172	MG257317	MG384393	----------	----------	----------		UNMC	K. Wright
Eucerini	Melissodes	Eumelissodes	robustior2	188	MG250023	MG257055	MG257198	MG257344	MG384419	----------	----------	----------	ArgK, reverse only	UNMC	K. Wright
Eucerini	Melissodes	Eumelissodes	rufipes	295	MG250069	MG257125	MG257269	MG257419	MG384489	----------	----------	----------		CEET	J. Merida
Eucerini	Melissodes	Eumelissodes	saponellus	319	MG256989	MG257137	MG257281	MG257432	MG384502	----------	----------	----------		BLCU	M.E. Irwin
Eucerini	Melissodes	Eumelissodes	semilupinus	262	MG250057	----------	MG257247	MG257397	MG384468	----------	----------	----------		UNMC	P.F. Torchio
Eucerini	Melissodes	Eumelissodes	snowii	19	MG250025	MG257057	MG257200	MG257346	MG384421	----------	----------	----------		UNMC	K. Wright
Eucerini	Melissodes	Eumelissodes	subagilis	314	MG250071	----------	MG257279	MG257430	MG384500	----------	----------	----------		UNMC	K. Wright
Eucerini	Melissodes	Eumelissodes	subillatus1	186	----------	MG257053	MG257196	MG257342	MG384417	----------	----------	----------		UNMC	E. Evans
Eucerini	Melissodes	Eumelissodes	subillatus2	383	----------	MG257160	MG257304	MG257456	MG384527	----------	----------	----------		UNMC	D.B. Bishop
Eucerini	Melissodes	Eumelissodes	subillatus3	384	----------	MG257161	MG257305	MG257457	----------	----------	----------	----------		UNMC	K. Wright
Eucerini	Melissodes	Eumelissodes	submenuacha1	69	MG250083	MG257170	MG257315	MG257467	MG384537	----------	----------	----------		UNMC	K. Wright
Eucerini	Melissodes	Eumelissodes	submenuacha2	198	MG250031	MG257064	MG257207	MG257353	MG384428	----------	----------	----------		UNMC	K. Wright
Eucerini	Melissodes	Eumelissodes	tinctus	209	MG250036	MG257070	MG257213	MG257359	MG384434	----------	----------	----------		UNMC	J.G. Rozen
Eucerini	Melissodes	Eumelissodes	trinodis	164	MG250017	MG257041	MG257185	MG257330	MG384406	----------	----------	----------		UNMC	T. Harrison
Eucerini	Melissodes	Eumelissodes	tristis	52	MG250081	MG257167	MG257312	MG257464	MG384534	----------	----------	----------		UNMC	K. Wright
Eucerini	Melissodes	Eumelissodes	unk11	159	----------	MG257039	MG257182	MG257327	MG384403	----------	----------	----------		UNMC	K. Wright
Eucerini	Melissodes	Eumelissodes	unk15	200	MG257009	MG257066	MG257209	MG257355	MG384430	----------	----------	----------	ArgK, reverse only	UNMC	K.J. Hung
Eucerini	Melissodes	Eumelissodes	utahensis	234	MG250048	MG257088	MG257232	MG257378	MG384450	----------	----------	----------	ArgK, reverse only	BLCU	T.L. Griswold
Eucerini	Melissodes	Eumelissodes	velutinus1	197	MG250030	MG257063	MG257206	MG257352	MG384427	----------	----------	----------	ArgK, reverse only	UNMC	K.J. Hung
Eucerini	Melissodes	Eumelissodes	velutinus2	275	MG250063	MG257112	MG257255	MG257405	----------	----------	----------	----------	ArgK, reverse only	UNMC	K.J. Hung
Eucerini	Melissodes	Eumelissodes	verbesinarum	16	MG250015	----------	MG257183	MG257328	MG384404	----------	----------	----------		UNMC	K. Wright
Eucerini	Melissodes	Eumelissodes	vernalis1	229	MG250046	MG257085	MG257229	MG257375	MG384447	----------	----------	----------		BLCU	F.D. Parker
Eucerini	Melissodes	Eumelissodes	vernalis2	321	----------	----------	MG257282	MG257433	MG384503	----------	----------	----------	PolII, reverse only	BLCU	F.D. Parker
Eucerini	Melissodes	Eumelissodes	vernoniae1	331	----------	MG257141	MG257286	MG257436	MG384506	----------	----------	----------		UCMC	Lenz
Eucerini	Melissodes	Eumelissodes	vernoniae2	355	MG256996	----------	MG257294	MG257444	MG384514	----------	----------	----------		OSEC	A. Begosh
Eucerini	Melissodes	Eumelissodes	wheeleri1	243	MG250051	MG257091	MG257235	MG257381	MG384453	----------	----------	----------		UNMC	K. Wright
Eucerini	Melissodes	Eumelissodes	wheeleri2	48	MG250080	MG257165	MG257310	MG257462	MG384532	----------	----------	----------		UNMC	K. Wright
Eucerini	Melissodes	Heliomelissodes	desponsus1	167	MG256975	MG257042	MG257186	MG257331	MG384407	----------	----------	----------	PolII, reverse only	UNMC	N/A
Eucerini	Melissodes	Heliomelissodes	desponsus2	227	MG256979	MG257084	MG257228	MG257374	----------	----------	----------	----------		UNMC	R.G. Goelet
Eucerini	Melissodes	Heliomelissodes	desponsus3	284	MG250067	----------	MG257263	MG257413	MG384483	----------	----------	----------		UNMC	R.D. Hackett
Eucerini	Melissodes	Heliomelissodes	desponsus4	NA	GU244942	----------	AF344603	GU245384	----------	GU244625	GU245093	GU245546		From Cardinal and Danforth, 2013	?
Eucerini	Melissodes	Heliomelissodes	rivalis1	276	MG250064	MG257113	MG257256	MG257406	MG384476	----------	----------	----------	EF1a, reverse only	BLCU	H. Ikerd
Eucerini	Melissodes	Heliomelissodes	rivalis2	283	MG250066	MG257119	MG257262	MG257412	MG384482	----------	----------	----------		BLCU	T.L. Griswold
Eucerini	Melissodes	Heliomelissodes	rivalis3	207	MG250035	MG257069	MG257212	MG257358	MG384433	----------	----------	----------	ArgK, reverse only	UNMC	K. Wright
Eucerini	Melissodes	Melissodes	bimaculatus	261	MG250056	MG257105	MG257246	MG257396	MG384467	----------	----------	----------		UCMC	Kearns
Eucerini	Melissodes	Melissodes	colliciatus1	265	MG250058	MG257106	MG257248	MG257398	MG384469	----------	----------	----------		BLCU	N/A
Eucerini	Melissodes	Melissodes	colliciatus2	363	MG256999	MG257150	MG257297	MG257447	MG384517	----------	----------	----------		UNMC	K. Wright
Eucerini	Melissodes	Melissodes	communis1	138	MG250012	MG257033	MG257176	MG257321	MG384397	----------	----------	----------		UNMC	H. Hopkins
Eucerini	Melissodes	Melissodes	communis2	329	MG250072	MG257140	MG257285	MG257435	----------	----------	----------	----------		UCRC	D. Yanega
Eucerini	Melissodes	Melissodes	comptoides1	339	----------	MG257145	MG257290	MG257440	MG384510	----------	----------	----------		UNMC	C. Digman
Eucerini	Melissodes	Melissodes	comptoides2	349	MG256994	MG257146	MG257291	MG257441	MG384511	----------	----------	----------		UNMC	K. Roccaforte
Eucerini	Melissodes	Melissodes	comptoides3	356	MG256997	MG257148	MG257295	MG257445	MG384515	----------	----------	----------		???	N/A
Eucerini	Melissodes	Melissodes	gilensis	184	MG257008	MG257051	MG257194	MG257340	MG384415	----------	----------	----------		UNMC	K.B. Miller
Eucerini	Melissodes	Melissodes	labiatarum	292	MG250068	MG257123	MG257267	MG257417	MG384487	----------	----------	----------		CEET	E. Esquivel
Eucerini	Melissodes	Melissodes	morrilli	294	MG257025	MG257124	MG257268	MG257418	MG384488	----------	----------	----------		CEET	J. Merida
Eucerini	Melissodes	Melissodes	panamensis	267	----------	MG257107	MG257249	MG257399	MG384470	----------	----------	----------		BLCU	F.D. Parker
Eucerini	Melissodes	Melissodes	paroselae	226	----------	MG257083	MG257227	MG257373	MG384446	----------	----------	----------		BLCU	T.L. Griswold
Eucerini	Melissodes	Melissodes	tepaneca	246	----------	MG257094	MG257238	MG257384	MG384456	----------	----------	----------		UNMC	K. Wright
Eucerini	Melissodes	Melissodes	tepidus	268	MG257019	MG257108	MG257250	MG257400	MG384471	----------	----------	----------		UNMC	S. Walden
Eucerini	Melissodes	Melissodes	tessellatus	195	MG256978	MG257062	MG257205	MG257351	MG384426	----------	----------	----------	EF1a, reverse only	UNMC	K. Hung
Eucerini	Melissodes	Melissodes	thelypodii	173	MG250018	MG257047	MG257191	MG257336	MG384411	----------	----------	----------		UNMC	K. Wright
Eucerini	Melissodes	Psilomelissodes	intortus	245	MG257015	MG257093	MG257237	MG257383	MG384455	----------	----------	----------	ArgK, reverse only	UNMC	K. Wright
Eucerini	Melissodes	Tachymelissodes	dagosus	221	MG250043	----------	MG257224	MG257370	MG384444	----------	----------	----------		BLCU	H. Ikerd
Eucerini	Melissodes	Tachymelissodes	opuntiellus1	222	MG250044	MG257081	MG257225	MG257371	----------	----------	----------	----------	ArgK, reverse only	BLCU	T.L. Griswold
Eucerini	Melissodes	Tachymelissodes	opuntiellus2	277	MG257020	MG257114	MG257257	MG257407	MG384477	----------	----------	----------	ArgK, forward only, COII forward only	UNMC	J.G. Rozen
Eucerini	Melissodes	Tachymelissodes	sphaeralceae	279	MG250065	MG257116	MG257259	MG257409	MG384479	----------	----------	----------		UNMC	A. Payne
Eucerini	Svastra	Epimelissodes	helianthelli	257	MG250053	MG257101	MG257243	MG257392	MG384463	----------	----------	----------		UNMC	K. Wright
Eucerini	Svastra	Epimelissodes	machaerantherae	258	MG250054	MG257102	MG257244	MG257393	MG384464	----------	----------	----------	COI, reverse only	UNMC	K. Wright
Eucerini	Svastra	Epimelissodes	obliqua	130	MG250009	MG257030	MG257173	MG257318	MG384394	----------	----------	----------		UNMC	K. Wright
Eucerini	Svastra	Epimelissodes	texana1	259	MG250055	MG257103	MG257245	MG257394	MG384465	----------	----------	----------		UNMC	K. Wright
Eucerini	Svastra	Epimelissodes	texana2	64	----------	MG257169	MG257314	MG257466	MG384536	----------	----------	----------		UNMC	K. Wright
Eucerini	Svastra	Idiomelissodes	duplocincta1	249	MG250052	MG257095	MG257239	MG257385	----------	----------	----------	----------		UNMC	J.S. Ascher
Eucerini	Svastra	Idiomelissodes	duplocincta2	169	MG257005	MG257043	MG257187	MG257332	----------	----------	----------	----------		UNMC	K. Wright
Eucerini	Svastrina	NA	subapicalis	NA	----------	----------	GU245266	GU245391	----------	GU244632	GU245100	GU245553		From Cardinal and Danforth, 2013	?
Exomalopsini	Anthophorula	Anthophorula	compactula	376	----------	MG257158	----------	----------	MG384525	----------	----------	----------		UNMC	K. Wright
Exomalopsini	Anthophorula	Anthophorula	completa	NA	GU244948	----------	AF344622	GU245398	----------	GU244639	GU245107	GU245560		From Cardinal and Danforth, 2013	?
Exomalopsini	Exomalopsis	??	sp.	NA	GU244989	----------	HM211835	GU245401	----------	GU244642	GU245110	GU245563		From Cardinal and Danforth, 2013	?
Exomalopsini	Exomalopsis	Stilbomalopsis	solani1	312	MG256987	MG257134	----------	MG257428	MG384498	----------	----------	----------		UNMC	K. Wright
Exomalopsini	Exomalopsis	Stilbomalopsis	solani2	180	MG250021	MG257050	----------	MG257339	MG384414	----------	----------	----------		UNMC	K. Wright
Tapinotaspidini	Arhysoceble	NA	picta	NA	GU244976	----------	GU245297	GU245428	----------	GU244467	GU245142	GU245595		From Cardinal and Danforth, 2013	?
Tapinotaspidini	Caenonomada	NA	unicalcarata	NA	GU244974	----------	GU245295	GU245426	----------	GU244669	GU245140	GU245593		From Cardinal and Danforth, 2013	?
